# Supplementary material for: Novel 3D anionic heterometallic frameworks based on trinuclear CoII and trinuclear LnIII motifs displaying slow magnetic relaxation and selective adsorption of methylene blue
Source: Royal Society of Chemistry journal article supplement (doi:10.1039/d0ce01254h), 2020-01-01
Supplement: d0ce01254h1.pdf [file d0ce01254h1.pdf]

**Novel 3D anionic heterometallic frameworks based on trinuclear Co<sup>II</sup> and  
trinuclear Ln<sup>III</sup> motifs: displaying slow magnetic relaxation and selective  
adsorption of methylene blue**

Han Wei, Cui-Li Wang Wei Gao\*, Jie-Ping Liu and Xiu-Mei Zhang\*

**Table S1** Selected bond lengths (Å) and angles (°) for CoEu (1)

|              |           |              |           |
|--------------|-----------|--------------|-----------|
| Eu1-O9A      | 2.291(12) | Eu1-O9       | 2.291(12) |
| Eu1-O1B      | 2.322(6)  | Eu1-O1C      | 2.322(6)  |
| Eu1-O6D      | 2.430(6)  | Eu1-O6E      | 2.430(6)  |
| Eu1-O21      | 2.452(13) | Eu2-O7F      | 2.297(6)  |
| Eu2-O10G     | 2.309(11) | Eu2-O2H      | 2.355(5)  |
| Eu2-O5I      | 2.417(5)  | Eu2-O12      | 2.430(6)  |
| Eu2-O3D      | 2.486(6)  | Eu2-O4D      | 2.508(5)  |
| Eu2-O11      | 2.576(6)  |              |           |
| Co1-O14      | 2.065(11) | Co1-O13      | 2.111(12) |
| Co1-N2       | 2.152(6)  | Co1-N2B      | 2.152(6)  |
| Co1-N10B     | 2.194(15) | Co1-N10      | 2.194(15) |
| Co2-O15      | 2.027(11) | Co2-O13      | 2.100(11) |
| Co2-N6       | 2.126(8)  | Co2-N6B      | 2.126(8)  |
| Co2-N3       | 2.126(6)  | Co2-N3B      | 2.126(6)  |
| Co3-O17      | 2.054(9)  | Co3-O13      | 2.054(10) |
| Co3-N11B     | 2.074(15) | Co3-O18      | 2.090(9)  |
| Co3-N7       | 2.111(12) | Co3-O16      | 2.120(9)  |
| O9A-Eu1-O9   | 153.2(7)  | O9A-Eu1-O1B  | 85.7(4)   |
| O9-Eu1-O1B   | 83.4(4)   | O9A-Eu1-O1C  | 83.4(4)   |
| O9-Eu1-O1C   | 85.7(4)   | O1B-Eu1-O1C  | 131.5(3)  |
| O9A-Eu1-O6D  | 95.0(3)   | O9-Eu1-O6D   | 105.7(4)  |
| O1B-Eu1-O6D  | 75.18(19) | O1C-Eu1-O6D  | 152.7(2)  |
| O9A-Eu1-O6E  | 105.7(4)  | O9-Eu1-O6E   | 95.0(3)   |
| O1B-Eu1-O6E  | 152.7(2)  | O1C-Eu1-O6E  | 75.18(19) |
| O6D-Eu1-O6E  | 79.1(3)   | O9A-Eu1-O21  | 56.3(5)   |
| O9-Eu1-O21   | 97.2(5)   | O1B-Eu1-O21  | 61.0(4)   |
| O1C-Eu1-O21  | 73.9(4)   | O6D-Eu1-O21  | 127.4(4)  |
| O6E-Eu1-O21  | 145.7(4)  | O21A-Eu1-O21 | 43.4(7)   |
| O7F-Eu1-O10G | 74.0(4)   | O7F-Eu2-O2H  | 150.1(2)  |
| O10G-Eu2-O2H | 94.9(3)   | O7F-Eu2-O5I  | 80.8(3)   |
| O10G-Eu2-O5I | 117.0(4)  | O2H-Eu2-O5I  | 79.9(2)   |
| O7F-Eu2-O12  | 129.3(2)  | O10G-Eu2-O12 | 78.8(4)   |

|              |           |              |            |
|--------------|-----------|--------------|------------|
| O2H-Eu2-O12  | 73.0(2)   | O5I-Eu2-O12  | 149.8(2)   |
| O7F-Eu2-O3D  | 127.7(2)  | O10G-Eu2-O3D | 156.2(3)   |
| O2H-Eu2-O3D  | 70.48(18) | O5I-Eu2-O3D  | 79.8(2)    |
| O12-Eu2-O3D  | 78.9(2)   | O7F-Eu2-O4D  | 78.0(2)    |
| O10G-Eu2-O4D | 142.5(3)  | O2H-Eu2-O4D  | 121.21(19) |
| O5I-Eu2-O4D  | 81.9(2)   | O12-Eu2-O4D  | 100.9(3)   |
| O3D-Eu2-O4D  | 51.41(18) | O7F-Eu2-O11  | 78.6(2)    |
| O10G-Eu2-O11 | 74.7(4)   | O2H-Eu2-O11  | 126.0(2)   |
| O5I-Eu2-O11  | 152.2(2)  | O12-Eu2-O11  | 53.0(2)    |
| O3D-Eu2-O11  | 98.3(2)   | O4D-Eu2-O11  | 75.7(2)    |
| O14-Co1-O13  | 179.5(5)  | O14-Co1-N2   | 92.8(3)    |
| O13-Co1-N2   | 87.6(3)   | O14-Co1-N2B  | 92.8(3)    |
| O13-Co1-N2B  | 87.6(3)   | N2-Co1-N2B   | 87.4(3)    |
| O14-Co1-N10B | 99.1(4)   | O13-Co1-N10B | 80.6(4)    |
| N2-Co1-N10B  | 83.1(5)   | N2B-Co1-N10B | 165.1(5)   |
| O14-Co1-N10  | 99.1(4)   | O13-Co1-N10  | 80.6(4)    |
| N2-Co1-N10   | 165.1(5)  | N2B-Co1-N10  | 83.1(5)    |
| N10B-Co1-N10 | 103.8(9)  | O15-Co2-O13  | 179.2(5)   |
| O15-Co2-N6   | 90.1(3)   | O13-Co2-N6   | 90.4(3)    |
| O15-Co2-N6B  | 90.1(3)   | O13-Co2-N6B  | 90.4(3)    |
| N6-Co2-N6B   | 94.5(4)   | O15-Co2-N3   | 92.9(3)    |
| O13-Co2-N3   | 86.6(3)   | N6-Co2-N3    | 88.8(3)    |
| N6B-Co2-N3   | 175.6(3)  | O15-Co2-N3B  | 92.9(3)    |
| O13-Co2-N3B  | 86.6(3)   | N6-Co2-N3B   | 175.6(3)   |
| N6B-Co2-N3B  | 88.8(3)   | N3-Co2-N3B   | 87.8(3)    |
| O17-Co3-O13  | 107.7(4)  | O17-Co3-N11B | 170.8(6)   |
| O13-Co3-O11B | 80.4(5)   | O17-Co3-O18  | 89.8(6)    |
| O13-Co3-O18  | 96.0(5)   | N11B-Co3-O18 | 84.9(6)    |
| O17-Co3-N7   | 86.6(5)   | O13-Co3-N7   | 88.4(4)    |
| N11B-Co3-N7  | 98.1(6)   | O18-Co3-N7   | 175.0(6)   |
| O17-Co3-O16  | 75.8(7)   | O13-Co3-O16  | 175.5(6)   |
| N11B-Co3-O16 | 96.4(7)   | O18-Co3-O16  | 86.8(7)    |
| N7-Co3-O16   | 89.0(7)   |              |            |

Symmetry codes: A:  $-x+1, y, -z+2$ ; B:  $x, -y+1, z$ ; C:  $-x+1, -y+1, -z+2$ ; D:  $-x+1/2, y+1/2, -z+1$ ; E:  $x+1/2, y+1/2, z+1$ ; F:  $x+1/2, y+1/2, z$ ; G:  $-x+1, y, -z+1$ ; H:  $x, -y+1, z-1$ ; I:  $-x+1/2, y+1/2, -z$ .

**Table S2** Selected bond lengths (Å) and angles (°) for CoGd (2)

|         |           |          |           |
|---------|-----------|----------|-----------|
| Gd1-O9A | 2.260(17) | Gd1-O9   | 2.260(17) |
| Gd1-O1B | 2.359(11) | Gd1-O1C  | 2.359(11) |
| Gd1-O6D | 2.376(12) | Gd1-O6E  | 2.376(12) |
| Gd1-O21 | 2.54(3)   | Gd2-O10F | 2.284(19) |

|              |           |              |           |
|--------------|-----------|--------------|-----------|
| Gd2-O7G      | 2.306(11) | Gd2-O2H      | 2.351(11) |
| Gd2-O5I      | 2.389(11) | Gd2-O12      | 2.409(13) |
| Gd2-O3D      | 2.488(12) | Gd2-O4D      | 2.496(11) |
| Gd2-O11      | 2.537(12) | Co1-O13      | 2.03(2)   |
| Co1-O14      | 2.09(2)   | Co1-N2       | 2.156(13) |
| Co1-N2B      | 2.156(13) | Co1-N10      | 2.16(2)   |
| Co1-N10B     | 2.16(2)   | Co2-O15      | 2.059(18) |
| Co2-N6       | 2.123(14) | Co2-N6B      | 2.123(14) |
| Co2-N3B      | 2.135(12) | Co2-N3       | 2.135(12) |
| Co2-O13      | 2.16(2)   | Co3-N11B     | 2.08(3)   |
| Co3-O13      | 2.05(2)   | Co3-O17      | 2.083(10) |
| Co3-O18      | 2.092(10) | Co3-O16      | 2.104(10) |
| Co3-N7       | 2.20(3)   |              |           |
| O9A-Gd1-O9   | 157.3(12) | O9A-Gd1-O1B  | 90.2(7)   |
| O9-Gd1-O1B   | 80.4(6)   | O9A-Gd1-O1C  | 80.4(6)   |
| O9-Gd1-O1C   | 90.2(7)   | O1B-Gd1-O1C  | 130.9(6)  |
| O9A-Gd1-O6D  | 98.0(6)   | O9-Gd1-O6D   | 99.8(7)   |
| O1B-Gd1-O6D  | 76.4(4)   | O1C-Gd1-O6D  | 152.4(4)  |
| O9A-Gd1-O6E  | 99.8(7)   | O9-Gd1-O6E   | 98.0(6)   |
| O1B-Gd1-O6E  | 152.4(4)  | O1C-Gd1-O6E  | 76.4(4)   |
| O6D-Gd1-O6E  | 76.8(6)   | O9A-Gd1-O21  | 66.1(11)  |
| O9-Gd1-O21   | 91.2(11)  | O1B-Gd1-O21  | 62.7(12)  |
| O1C-Gd1-O21  | 69.5(12)  | O6D-Gd1-O21  | 135.1(12) |
| O6E-Gd1-O21  | 144.7(12) | O21A-Gd1-O21 | 26.9(18)  |
| O10F-Gd2-O7G | 74.2(7)   | O10F-Gd2-O2H | 93.7(6)   |
| O7G-Gd2-O2H  | 149.8(5)  | O10F-Gd2-O5I | 112.0(7)  |
| O7G-Gd2-O5I  | 78.9(5)   | O2H-Gd2-O5I  | 80.5(4)   |
| O10F-Gd2-O12 | 79.9(7)   | O7G-Gd2-O12  | 129.4(5)  |
| O2H-Gd2-O12  | 73.1(4)   | O5I-Gd2-O12  | 151.8(4)  |
| O10F-Gd2-O3D | 155.9(7)  | O7G-Gd2-O3D  | 128.2(4)  |
| O2H-Gd2-O3D  | 70.5(4)   | O5I-Gd2-O3D  | 84.0(5)   |
| O12-Gd2-O3D  | 78.1(5)   | O10F-Gd2-O4D | 143.1(6)  |
| O7G-Gd2-O4D  | 77.0(4)   | O2H-Gd2-O4D  | 122.3(4)  |
| O5I-Gd2-O4D  | 84.1(5)   | O12-Gd2-O4D  | 101.6(5)  |
| O3D-Gd2-O4D  | 52.7(4)   | O10F-Gd2-O11 | 76.8(6)   |
| O7G-Gd2-O11  | 78.9(4)   | O5H-Gd2-O11  | 126.0(4)  |
| O5I-Gd2-O11  | 152.6(4)  | O12-Gd2-O11  | 52.9(4)   |
| O3D-Gd2-O11  | 97.4(4)   | O4D-Gd2-O11  | 75.4(4)   |
| O13-Co1-O14  | 178.0(9)  | O13-Co1-N2   | 89.2(6)   |
| O14-Co1-N2   | 92.2(6)   | O13-Co1-N2B  | 89.2(6)   |
| O14-Co1-N2B  | 92.2(6)   | N2-Co1-N2B   | 88.4(7)   |
| O13-Co1-N10  | 81.7(6)   | O14-Co1-N10  | 97.0(7)   |
| N2-Co1-N10   | 168.6(7)  | N2B-Co1-N10  | 84.7(8)   |
| O13-Co1-N10B | 81.7(6)   | O14-Co1-N10B | 97.0(7)   |

|              |           |              |           |
|--------------|-----------|--------------|-----------|
| N2-Co1-N10B  | 84.7(8)   | N2B-Co1-N10B | 168.6(7)  |
| N10-Co1-N10B | 100.6(13) | O15-Co2-N6   | 90.2(6)   |
| O15-Co2-N6B  | 90.2(6)   | N6-Co2-N6B   | 95.3(8)   |
| O15-Co2-N3B  | 92.9(6)   | N6-Co2-N3B   | 174.8(5)  |
| O6B-Co2-N3B  | 88.8(6)   | O15-Co2-N3   | 92.9(6)   |
| N6-Co2-N3    | 88.8(6)   | N6B-Co2-N3   | 174.8(5)  |
| N3B-Co2-N3   | 86.9(7)   | O15-Co2-O13  | 178.8(8)  |
| N6B-Co2-O13  | 90.6(6)   | N3B-Co2-O13  | 86.2(6)   |
| N3-Co2-O13   | 86.2(6)   | N11B-Co3-O13 | 79.3(9)   |
| N11B-Co3-O17 | 175.2(9)  | O13-Co3-O17  | 105.4(8)  |
| N11B-Co3-O18 | 81.4(12)  | O13-Co3-O18  | 91.9(10)  |
| O17-Co3-O18  | 98.0(10)  | N11B-Co3-O16 | 93.3(13)  |
| O13-Co3-O16  | 171.1(11) | O17-Co3-O16  | 82.0(12)  |
| O18-Co3-O16  | 91.9(13)  | N11B-Co3-N7  | 101.3(13) |
| O13-Co3-N7   | 90.9(9)   | O17-Co3-N7   | 79.0(9)   |
| O18-Co3-N7   | 176.4(12) | O16-Co3-N7   | 85.7(13)  |

Symmetry codes: A:  $-x+1, y, -z+2$ ; B:  $x, -y+1, z$ ; C:  $-x+1, -y+1, -z+2$ ; D:  $-x+1/2, y+1/2, -z+1$ ; E:  $x+1/2, y+1/2, z+1$ ; F:  $x+1/2, y+1/2, z$ ; G:  $-x+1, y, -z+1$ ; H:  $x, -y+1, z-1$ ; I:  $-x+1/2, y+1/2, -z$ .

**Table S3** Selected bond lengths (Å) and angles (°) for CoTb (**3**)

|             |           |             |           |
|-------------|-----------|-------------|-----------|
| Tb1-O9A     | 2.221(7)  | Tb1-O9      | 2.221(7)  |
| Tb1-O1B     | 2.294(5)  | Tb1-O1C     | 2.294(5)  |
| Tb1-O6D     | 2.319(5)  | Tb1-O6E     | 2.319(5)  |
| Tb1-O21     | 2.460(12) | Tb2-O10F    | 2.247(8)  |
| Tb2-O7G     | 2.284(5)  | Tb2-O2H     | 2.298(4)  |
| Tb2-O5I     | 2.332(5)  | Tb2-O12     | 2.377(5)  |
| Tb2-O3D     | 2.452(5)  | Tb2-O4D     | 2.468(5)  |
| Tb2-O11     | 2.503(5)  | Co1-O14     | 2.062(9)  |
| Co1-O13     | 2.073(8)  | Co1-N2B     | 2.146(5)  |
| Co1-N2      | 2.146(5)  | Co1-N10     | 2.202(18) |
| Co1-N10B    | 2.202(18) | Co2-O13     | 2.083(8)  |
| Co2-O15     | 2.083(10) | Co2-N6      | 2.098(7)  |
| Co2-N6B     | 2.098(7)  | Co2-N3B     | 2.110(5)  |
| Co2-N3      | 2.110(5)  | Co3-O13     | 2.029(7)  |
| Co3-N7      | 2.039(9)  | Co3-N11B    | 2.054(14) |
| Co3-O17     | 2.097(9)  | Co3-O18     | 2.096(8)  |
| Co3-O16     | 2.112(9)  |             |           |
| O9A-Tb1-O9  | 159.1(5)  | O9A-Tb1-O1B | 87.7(4)   |
| O9-Tb1-O1B  | 84.1(3)   | O9A-Tb1-O1C | 84.1(3)   |
| O9-Tb1-O1C  | 87.7(4)   | O1B-Tb1-O1C | 133.6(3)  |
| O9A-Tb1-O6D | 97.6(2)   | O9-Tb1-O6D  | 98.9(4)   |
| O1B-Tb1-O6D | 75.50(18) | O1C-Tb1-O6D | 150.8(2)  |

|              |            |              |            |
|--------------|------------|--------------|------------|
| O9A-Tb1-O6E  | 98.9(4)    | O9-Tb1-O6E   | 97.6(2)    |
| O1B-Tb1-O6E  | 150.81(19) | O1C-Tb1-O6E  | 75.50(18)  |
| O6D-Tb1-O6E  | 75.5(2)    | O9A-Tb1-O21  | 69.1(5)    |
| O9-Tb1-O21   | 90.2(5)    | O1B-Tb1-O21  | 60.5(4)    |
| O1C-Tb1-O21  | 74.0(4)    | O6D-Tb1-O21  | 133.9(4)   |
| O6E-Tb1-O21  | 148.1(4)   | O10F-Tb2-O7G | 74.2(3)    |
| O10F-Tb2-O2H | 92.3(3)    | O7G-Tb2-O2H  | 149.85(18) |
| O10F-Tb2-O5I | 111.9(3)   | O7G-Tb2-O5I  | 80.1(2)    |
| O2H-Tb2-O5I  | 80.23(18)  | O10F-Tb2-O12 | 80.7(3)    |
| O7G-Tb2-O12  | 129.5(2)   | O2H-Tb2-O12  | 72.33(19)  |
| O5I-Tb2-O12  | 150.4(2)   | O10F-Tb2-O3D | 156.6(3)   |
| O7G-Tb2-O3D  | 127.83(19) | O2H-Tb2-O3D  | 71.60(17)  |
| O5I-Tb2-O3D  | 82.7(2)    | O12-Tb2-O3D  | 78.2(2)    |
| O10F-Tb2-O4D | 144.2(3)   | O7G-Tb2-O4D  | 77.48(18)  |
| O2H-Tb2-O4D  | 122.69(17) | O5I-Tb2-O4D  | 83.94(19)  |
| O12-Tb2-O4D  | 101.4(2)   | O3D-Tb2-O4D  | 51.85(16)  |
| O10F-Tb2-O11 | 78.7(3)    | O7G-Tb2-O11  | 79.6(2)    |
| O2H-Tb2-O11  | 124.87(18) | O5I-Tb2-O11  | 153.43(19) |
| O12-Tb2-O11  | 52.57(19)  | O3D-Tb2-O11  | 96.39(19)  |
| O4D-Tb2-O11  | 75.0(2)    | O14-Co1-O13  | 177.5(4)   |
| O14-Co1-N2B  | 95.1(3)    | O13-Co1-N2B  | 86.7(2)    |
| O14-Co1-N2   | 95.1(3)    | O13-Co1-N2   | 86.7(2)    |
| N2B-Co1-N2   | 87.0(3)    | O14-Co1-N10  | 99.3(4)    |
| O13-Co1-N10  | 79.2(3)    | N2B-Co1-N10  | 83.1(5)    |
| N2-Co1-N10   | 163.2(5)   | O14-Co1-N10B | 99.3(4)    |
| O13-Co1-N10B | 79.2(3)    | N2B-Co1-N10B | 163.2(5)   |
| N2-Co1-N10B  | 83.1(5)    | N10-Co1-N10B | 103.0(10)  |
| O13-Co2-O15  | 178.1(4)   | O13-Co2-N6   | 90.5(3)    |
| O15-Co2-N6   | 90.8(3)    | O13-Co2-N6B  | 90.5(3)    |
| O15-Co2-N6B  | 90.8(3)    | N6-Co2-N6B   | 93.8(4)    |
| O13-Co2-N3B  | 86.8(2)    | O15-Co2-N3B  | 91.8(3)    |
| N6-Co2-N3B   | 176.2(3)   | N6B-Co2-N3B  | 88.8(3)    |
| O13-Co2-N3   | 86.8(2)    | O15-Co2-N3   | 91.8(3)    |
| N6-Co3-N3    | 88.8(3)    | N6B-Co3-N3   | 176.2(3)   |
| N3B-Co2-N3   | 88.4(3)    | O13-Co3-N7   | 94.9(4)    |
| O13-Co3-N11B | 78.3(5)    | N7-Co3-N11B  | 97.2(6)    |
| O13-Co3-O17  | 106.2(4)   | N7-Co3-O17   | 82.1(5)    |
| O11B-Co3-O17 | 175.5(5)   | O13-Co3-O18  | 97.1(4)    |
| N7-Co3-O18   | 166.4(6)   | N11B-Co3-O18 | 91.3(6)    |
| O17-Co3-O18  | 88.6(6)    | O13-Co3-O16  | 177.1(7)   |
| N7-Co3-O16   | 85.6(7)    | N11B-Co3-O16 | 98.7(8)    |
| O17-Co3-O16  | 76.7(7)    | O18-Co3-O16  | 82.7(7)    |

---

Symmetry codes: A: -x+1, y, -z+2; B: x, -y+1, z; C: -x+1, -y+1, -z+2; D: -x+1/2, y+1/2, -z+1; E: x+1/2, y+1/2, z+1; F: x+1/2, y+1/2, z; G: -x+1, y, -z+1; H: x, -y+1, z-

---

1; I: -x+1/2, y+1/2, -z.

---

**Table S4** Selected bond lengths (Å) and angles (°) for CoDy (4)

---

|              |           |               |           |
|--------------|-----------|---------------|-----------|
| Dy1-O9       | 2.237(11) | Dy1-O9A       | 2.237(11) |
| Dy1-O1B      | 2.308(12) | Dy1-O1C       | 2.308(12) |
| Dy1-O6D      | 2.315(12) | Dy1-O6E       | 2.315(12) |
| Dy1-O21      | 2.473(19) | Dy2-O10F      | 2.278(12) |
| Dy2-O7G      | 2.270(11) | Dy2-O2H       | 2.315(10) |
| Dy2-O5I      | 2.371(11) | Dy2-O12       | 2.372(11) |
| Dy2-O4E      | 2.426(11) | Dy2-O3E       | 2.463(11) |
| Dy2-O11      | 2.528(10) | Co1-O13       | 2.046(19) |
| Co1-O14      | 2.153(19) | Co1-N2        | 2.162(13) |
| Co1-N2B      | 2.162(13) | Co1-N10B      | 2.19(3)   |
| Co1-N10      | 2.19(3)   | Co2-O13       | 2.09(2)   |
| Co2-O15      | 2.08(2)   | Co2-N6        | 2.107(13) |
| Co2-N6B      | 2.107(13) | Co2-N3        | 2.112(12) |
| Co2-N3B      | 2.112(12) | Co3-N11B      | 2.04(3)   |
| Co3-O13      | 2.079(17) | Co3-O17       | 2.090(9)  |
| Co3-O18      | 2.086(10) | Co3-O16       | 2.106(10) |
| Co3-N7       | 2.16(2)   |               |           |
| O9-Dy1-O9A   | 167.1(10) | O9-Dy1-O1B    | 84.3(5)   |
| O9A-Dy1-O1B  | 90.9(7)   | O9-Dy1-O1C    | 90.9(7)   |
| O9A-Dy1-O1C  | 84.3(5)   | O1B-Dy1-O1C   | 136.6(6)  |
| O9-Dy1-O6D   | 98.0(4)   | O9A-Dy1-O6D   | 92.2(7)   |
| O1B- Dy1-O6D | 148.9(4)  | O1C-Dy1-O6D   | 74.5(4)   |
| O9-Dy1-O6E   | 92.2(7)   | O9A-Dy1-O6E   | 98.0(4)   |
| O1B-Dy1-O6E  | 74.5(4)   | O1C-Dy1-O6E   | 148.9(4)  |
| O6D-Dy1-O6E  | 74.5(6)   | O9-Dy1-O21    | 89.3(9)   |
| O9A-Dy1-O21  | 77.8(9)   | O1B-Dy1-O21   | 65.3(11)  |
| O1C-Dy1-O21  | 71.5(10)  | O6D-Dy1-O21   | 145.3(11) |
| O6E-Dy1-O21  | 139.4(10) | O21A- Dy1-O21 | 13.4(14)  |
| O10F-Dy2-O7G | 75.7(5)   | O10F-Dy2-O2H  | 89.3(6)   |
| O7G-Dy2-O2H  | 147.7(4)  | O10F-Dy2-O5I  | 106.3(6)  |
| O7G-Dy2-O5I  | 78.3(5)   | O2H-Dy2-O5I   | 78.9(4)   |
| O10F-Dy2-O12 | 81.7(6)   | O7G-Dy2-O12   | 130.4(4)  |
| O2H-Dy2-O12  | 73.5(4)   | O5I-Dy2-O12   | 151.1(4)  |
| O10F-Dy2-O4E | 145.5(6)  | O7G-Dy2-O4E   | 77.3(4)   |
| O2H-Dy2-O4E  | 124.5(4)  | O5I-Dy2-O4E   | 88.7(4)   |
| O12-Dy2-O4E  | 100.1(5)  | O10F-Dy2-O3E  | 155.6(5)  |
| O7G-Dy2-O3E  | 128.4(4)  | O2H-Dy2-O3E   | 71.2(4)   |
| O5I-Dy2-O3E  | 84.6(5)   | O12-Dy2-O3E   | 78.9(5)   |
| O4E-Dy2-O3E  | 53.8(4)   | O10F-Dy2-O11  | 77.2(6)   |
| O7G-Dy2-O11  | 78.5(4)   | O2H-Dy2-O11   | 126.4(4)  |

|              |           |              |           |
|--------------|-----------|--------------|-----------|
| O5I-Dy2-O11  | 154.7(4)  | O12-Dy2-O11  | 53.5(4)   |
| O4E-Dy2-O11  | 76.6(4)   | O3E-Dy2-O11  | 102.3(4)  |
| O13-Co1-O14  | 179.3(9)  | O13-Co1-N2   | 87.5(6)   |
| O14-Co1-N2   | 92.0(6)   | O13-Co1-N2B  | 87.5(6)   |
| O14-Co1-N2B  | 92.0(6)   | N2-Co1-N2B   | 86.1(7)   |
| O13-Co1-N10B | 81.1(7)   | O14-Co1-N10B | 99.4(7)   |
| N2-Co1-N10B  | 83.8(10)  | N2B-Co1-N10B | 165.0(10) |
| O13-Co1-N10  | 81.1(7)   | O14-Co1-N10  | 99.4(7)   |
| O2-Co1-N10   | 165.0(10) | N2B-Co1-N10  | 83.8(10)  |
| N10B-Co1-N10 | 103.8(18) | O13-Co2-O15  | 178.1(8)  |
| O13-Co2-N6   | 90.5(6)   | O15-Co2-N6   | 90.8(6)   |
| O13-Co2-N6B  | 90.5(6)   | O15-Co2-N6B  | 90.8(6)   |
| N6-Co2-N6B   | 95.2(8)   | O13-Co2-N3   | 86.5(5)   |
| O15-Co2-N3   | 92.1(6)   | N6-Co2-N3    | 88.9(5)   |
| N6B-Co2-N3   | 175.0(6)  | O13-Co2-N3B  | 86.5(5)   |
| O15-Co2-N3B  | 92.1(6)   | N6-Co2-N3B   | 175.0(6)  |
| N6B-Co2-N3B  | 88.9(5)   | N3-Co2-N3B   | 86.9(7)   |
| N11B-Co3-O13 | 80.7(9)   | N11B-Co3-O17 | 173.6(12) |
| O13-Co3-O17  | 105.2(7)  | N11B-Co3-O18 | 85.6(13)  |
| O13-Co3-O18  | 94.6(8)   | O17-Co3-O18  | 91.3(10)  |
| N11B-Co3-O16 | 95.6(13)  | O13-Co3-O16  | 175.8(10) |
| O17-Co3-O16  | 78.6(11)  | O18-Co3-O16  | 87.0(13)  |
| N11B-Co3-N7  | 99.5(14)  | O13-Co3-N7   | 89.0(8)   |
| O17-Co3-N7   | 83.3(9)   | O18-Co3-N7   | 174.2(10) |
| O16-Co3-N7   | 89.7(12)  |              |           |

Symmetry codes: A:  $-x+1, y, -z+2$ ; B:  $x, -y+1, z$ ; C:  $-x+1, -y+1, -z+2$ ; D:  $-x+1/2, y+1/2, -z+1$ ; E:  $x+1/2, y+1/2, z+1$ ; F:  $x+1/2, y+1/2, z$ ; G:  $-x+1, y, -z+1$ ; H:  $x, -y+1, z-1$ ; I:  $-x+1/2, y+1/2, -z$ .

**Table S5** Selected bond lengths (Å) and angles (°) for CoHo (5)

|         |           |          |           |
|---------|-----------|----------|-----------|
| Ho1-O9A | 2.223(13) | Ho1-O9   | 2.223(13) |
| Ho1-O1B | 2.277(12) | Ho1-O1C  | 2.277(12) |
| Ho1-O6D | 2.302(13) | Ho1-O6E  | 2.302(13) |
| Ho1-O21 | 2.43(2)   | Ho2-O10F | 2.26(4)   |
| Ho2-O7G | 2.276(13) | Ho2-O2H  | 2.304(12) |
| Ho2-O5I | 2.364(12) | Ho2-O12  | 2.389(12) |
| Ho2-O4D | 2.433(12) | Ho2-O3D  | 2.450(13) |
| Ho2-O11 | 2.519(11) | Co1-O13  | 2.07(2)   |
| Co1-O14 | 2.10(2)   | Co1-N2B  | 2.158(14) |
| Co1-N2  | 2.158(14) | Co1-N10B | 2.15(3)   |
| Co1-N10 | 2.15(3)   | Co2-O15  | 2.041(19) |
| Co2-O13 | 2.06(2)   | Co2-N6   | 2.110(16) |

|              |           |              |           |
|--------------|-----------|--------------|-----------|
| Co2-N6B      | 2.110(16) | Co2-N3B      | 2.126(14) |
| Co2-N3       | 2.126(14) | Co3-N11B     | 2.08(3)   |
| Co3-O17      | 2.087(10) | Co3-O13      | 2.09(2)   |
| Co3-O16      | 2.099(10) | Co3-O18      | 2.097(10) |
| Co3-N7       | 2.19(2)   |              |           |
| O9A-Ho1-O9   | 166.5(8)  | O9A-Ho1-O1B  | 90.0(5)   |
| O9-Ho1-O1B   | 85.0(5)   | O9A-Ho1-O1C  | 85.0(5)   |
| O9-Ho1-O1C   | 90.0(5)   | O1B-Ho1-O1C  | 136.2(6)  |
| O9A-Ho1-O6D  | 98.6(5)   | O9-Ho1-O6D   | 92.2(5)   |
| O1B-Ho1-O6D  | 75.3(4)   | O1C-Ho1-O6D  | 148.5(5)  |
| O9A-Ho1-O6E  | 92.2(5)   | O9-Ho1-O6E   | 98.6(5)   |
| O1B-Ho1-O6E  | 148.5(5)  | O1C-Ho1-O6E  | 75.3(4)   |
| O6D-Ho1-O6E  | 73.4(7)   | O9A-Ho1-O21  | 79.4(12)  |
| O9-Ho1-O21   | 87.2(12)  | O1B-Ho1-O21  | 64.3(12)  |
| O1C-Ho1-O21  | 72.0(12)  | O6D-Ho1-O21  | 139.4(12) |
| O6E-Ho1-O21  | 146.7(13) | O21A-Ho1-O21 | 11.3(19)  |
| O10F-Ho2-O7G | 75.8(17)  | O10F-Ho2-O2H | 89.5(14)  |
| O7G-Ho2-O2H  | 147.3(5)  | O10F-Ho2-O5I | 106.1(12) |
| O7G-Ho2-O5I  | 77.4(5)   | O2H-Ho2-O5I  | 79.1(4)   |
| O10F-Ho2-O12 | 79.2(16)  | O7G-Ho2-O12  | 130.2(5)  |
| O2H-Ho2-O12  | 73.1(5)   | O5I-Ho2-O12  | 151.7(5)  |
| O10F-Ho2-O4D | 145.1(13) | O7G-Ho2-O4D  | 76.7(5)   |
| O2H-Ho2-O4D  | 124.9(5)  | O5I-Ho2-O4D  | 88.2(5)   |
| O12-Ho2-O4D  | 103.2(6)  | O10F-Ho2-O3D | 155.0(17) |
| O7G-Ho2-O3D  | 128.6(5)  | O2H-Ho2-O3D  | 71.9(5)   |
| O5I-Ho2-O3D  | 86.9(5)   | O12-Ho2-O3D  | 79.6(5)   |
| O4D-Ho2-O3D  | 53.9(4)   | O10F-Ho2-O11 | 77.3(9)   |
| O7G-Ho2-O11  | 78.6(5)   | O2H-Ho2-O11  | 126.9(4)  |
| O5I-Ho2-O11  | 154.0(4)  | O12-Ho2-O11  | 54.1(4)   |
| O4D-Ho2-O11  | 76.5(4)   | O3D-Ho2-O11  | 100.4(4)  |
| O13-Co1-O14  | 179.9(8)  | O13-Co1-N2B  | 87.5(6)   |
| O14-Co1-N2B  | 92.6(6)   | O13-Co1-N2   | 87.5(6)   |
| O14-Co1-N2   | 92.6(6)   | O2B-Co1-N2   | 86.2(8)   |
| O13-Co1-N10B | 82.1(7)   | O14-Co1-N10B | 97.9(7)   |
| N2B-Co1-N10B | 166.6(9)  | N2-Co1-N10B  | 85.0(9)   |
| O13-Co1-N10  | 82.1(7)   | O14-Co1-N10  | 97.9(7)   |
| N2B-Co1-N10  | 85.0(9)   | N2-Co1-N10   | 166.6(9)  |
| O10B-Co1-N10 | 101.8(15) | O15-Co2-O13  | 178.8(9)  |
| O15-Co2-N6   | 90.9(6)   | O13-Co2-N6   | 89.9(6)   |
| O15-Co2-N6B  | 90.9(6)   | O13-Co2-N6B  | 89.9(6)   |
| N6-Co2-N6B   | 96.2(9)   | O15-Co2-N3B  | 92.1(6)   |
| O13-Co2-N3B  | 87.0(6)   | N6-Co2-N3B   | 174.6(6)  |
| N6B-Co2-N3B  | 88.2(6)   | O15-Co2-N3   | 92.1(6)   |



|              |           |              |           |
|--------------|-----------|--------------|-----------|
| O13-Co2-N3   | 87.0(6)   | N6-Co2-N3    | 88.2(6)   |
| N6B-Co2-N3   | 174.6(6)  | N3B-Co2-N3   | 87.3(9)   |
| N11B-Co3-O17 | 172.0(12) | N11B-Co3-O13 | 82.1(9)   |
| O17-Co3-O13  | 105.2(8)  | N11B-Co3-O16 | 95.4(13)  |
| O17-Co3-O16  | 77.5(12)  | O13-Co3-O16  | 176.7(11) |
| N11B-Co3-O18 | 86.7(12)  | O17-Co3-O18  | 89.0(10)  |
| O13-Co3-O18  | 97.9(8)   | O16-Co3-O18  | 84.0(12)  |
| N11B-Co3-N7  | 99.7(13)  | O17-Co3-N7   | 84.2(9)   |
| O13-Co3-N7   | 86.4(8)   | O16-Co3-N7   | 92.1(12)  |
| O18-Co3-N7   | 172.8(11) |              |           |

Symmetry codes: A:  $-x+1, y, -z+2$ ; B:  $x, -y+1, z$ ; C:  $-x+1, -y+1, -z+2$ ; D:  $-x+1/2, y+1/2, -z+1$ ; E:  $x+1/2, y+1/2, z+1$ ; F:  $x+1/2, y+1/2, z$ ; G:  $-x+1, y, -z+1$ ; H:  $x, -y+1, z-1$ ; I:  $-x+1/2, y+1/2, -z$ .

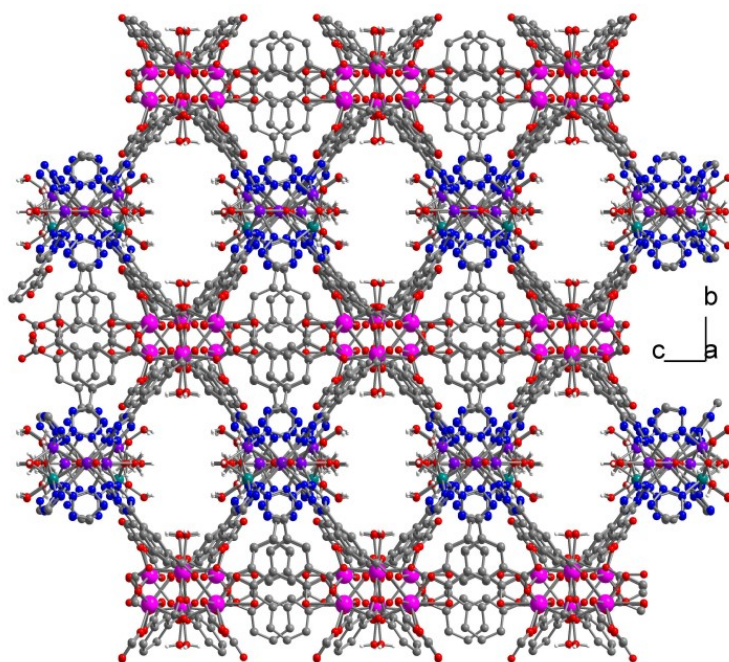

**Fig. S1** 3D structure of CoDy (4) along the *a*-axis.

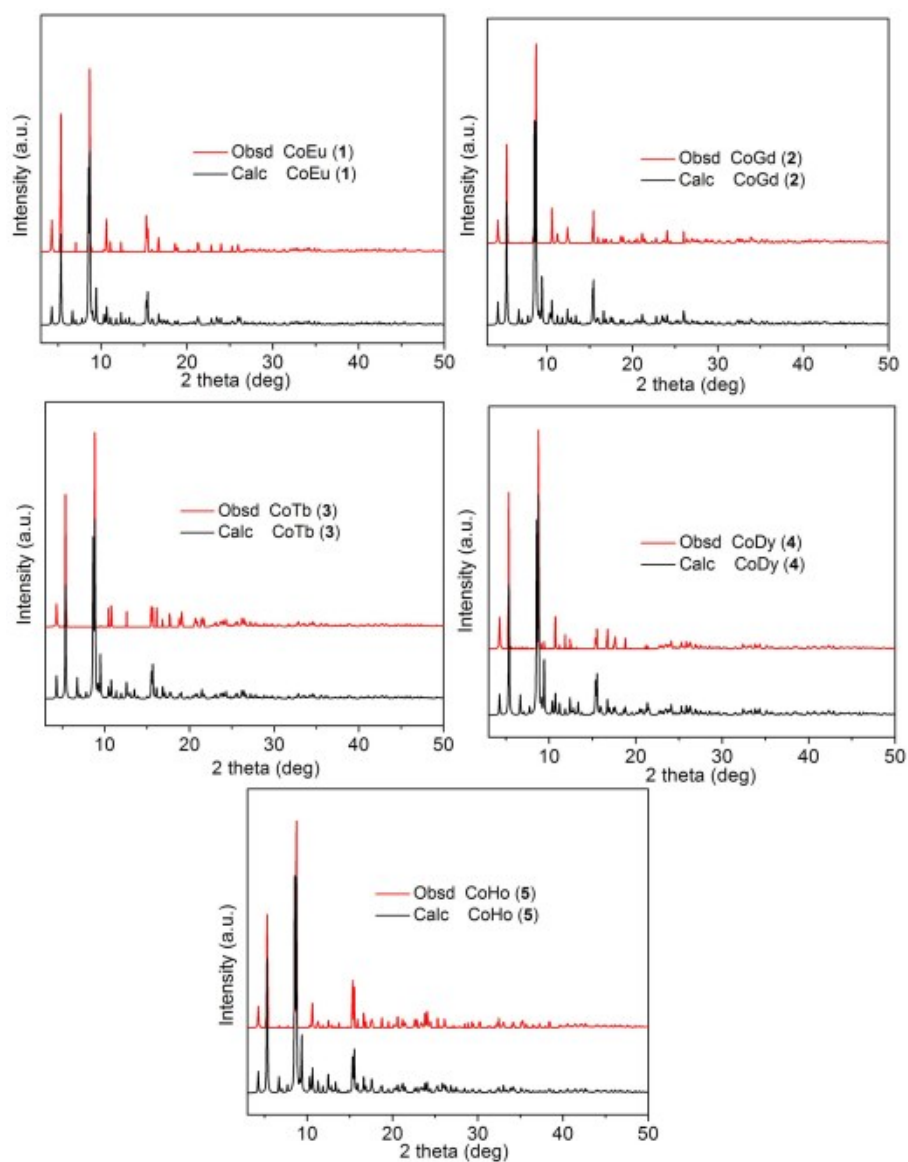

**Fig. S2** PXR D patterns of CoLn (1-5) (black line) simulated from the single-crystal data, (red line) for the as-synthesized sample.

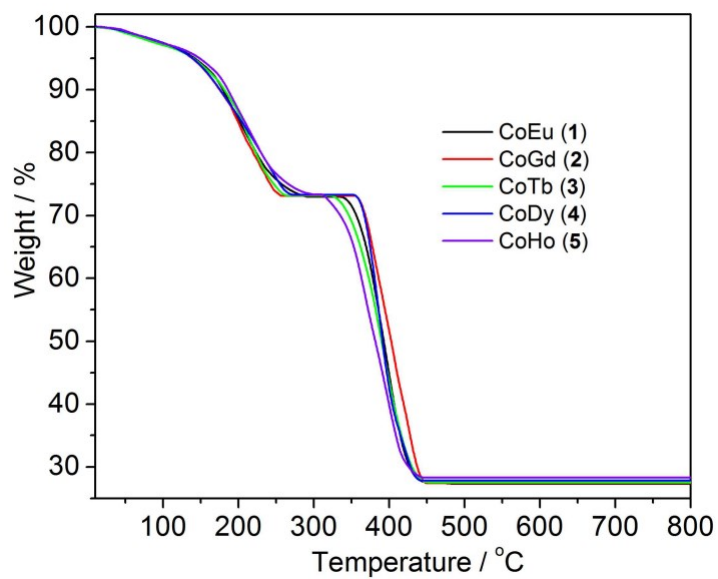

**Fig. S3** TGA plots of CoLn (1-5).

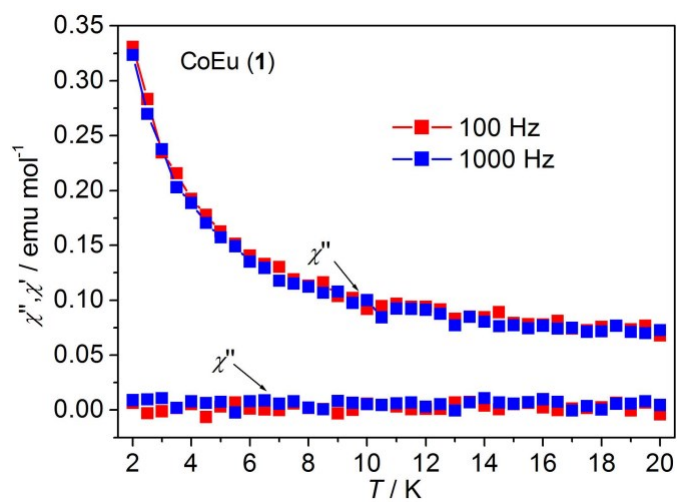

**Fig. S4** In-phase (shown as  $\chi'$ ) and out-of-phase ( $\chi''$ ) ac susceptibility signals of CoEu (1) oscillating at the indicated frequencies at  $H_{ac} = 2.0$  Oe and  $H_{dc} = 0$ .

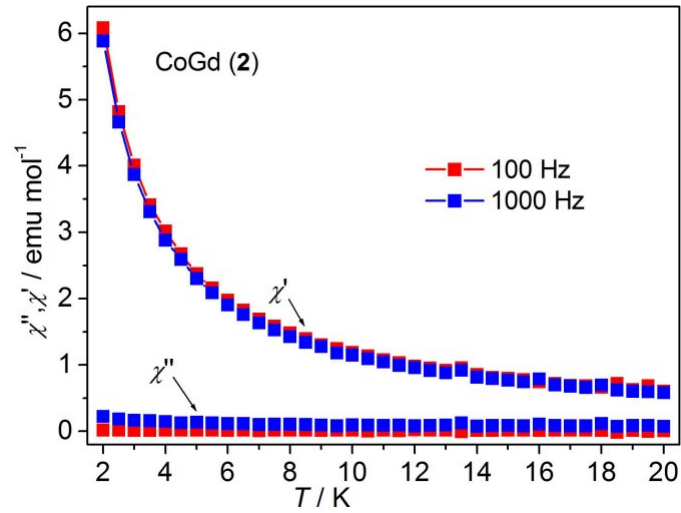

**Fig. S5** In-phase (shown as  $\chi'$ ) and out-of-phase ( $\chi''$ ) ac susceptibility signals of CoGd (2) oscillating at the indicated frequencies at  $H_{\text{ac}} = 2.0$  Oe and  $H_{\text{dc}} = 0$ .

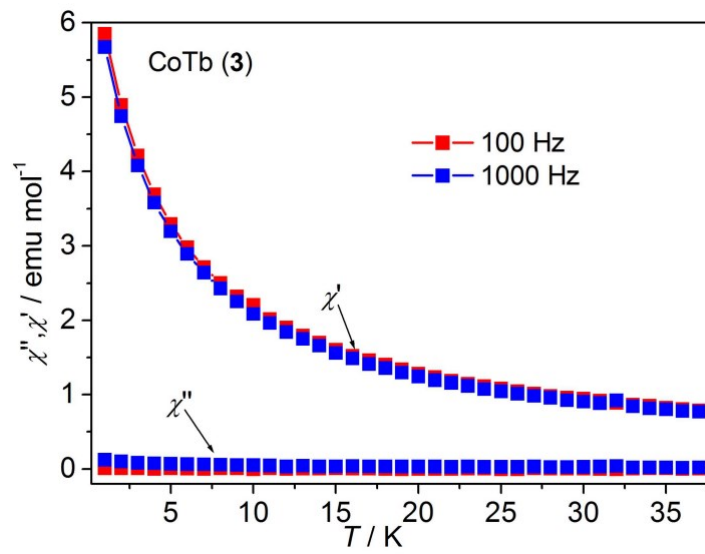

**Fig. S6** In-phase (shown as  $\chi'$ ) and out-of-phase ( $\chi''$ ) ac susceptibility signals of CoTb (3) oscillating at the indicated frequencies at  $H_{\text{ac}} = 2.0$  Oe and  $H_{\text{dc}} = 0$ .

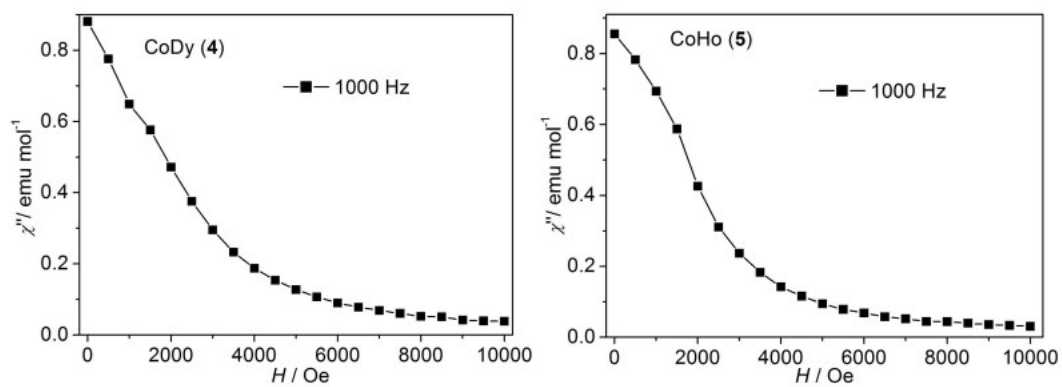

**Fig. S7** The out-of-phase ( $\chi''$ ) ac susceptibility for CoDy (**4**) and CoHo (**5**) (2 K,  $f = 1000$  Hz) under the applied static field from 0-10000 Oe.

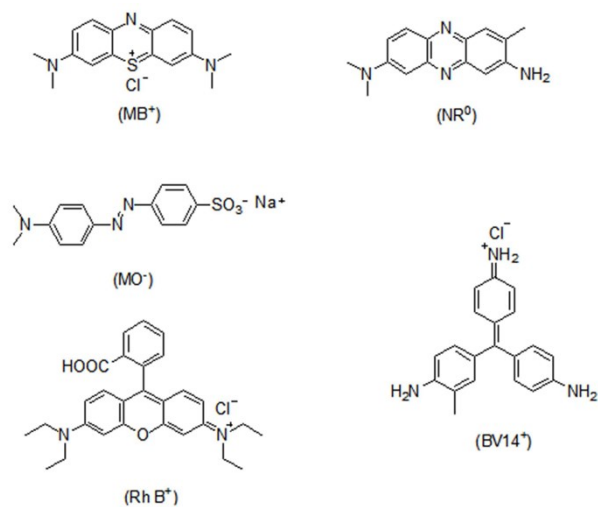

**Fig. S8** Chemical structures of dyes used in this study.

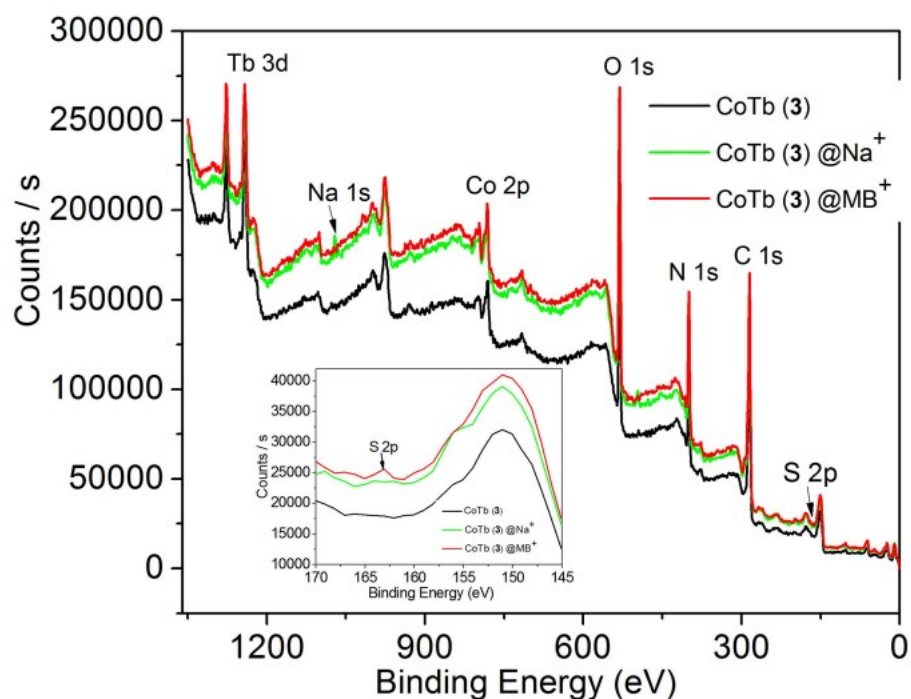

**Fig. S9** Comparison of the XPS spectra of CoTb (3) (black), CoTb (3)@MB<sup>+</sup> (red) and CoTb (3)@Na<sup>+</sup> (green).

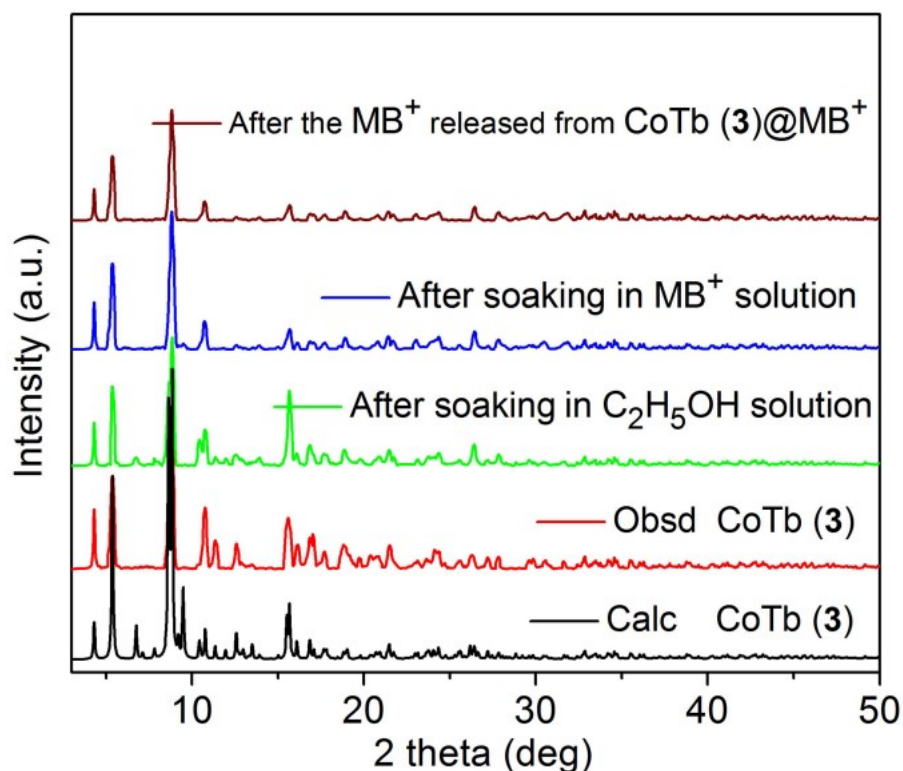

**Fig. S10** The powder X-ray diffraction patterns of simulated CoTb (3), as-synthesized CoTb (3), CoTb (3) immersed in EtOH solutions and after the absorption and desorption of MB<sup>+</sup>, respectively.
